# Supplementary material
Source: PubMed Central journal article supplement (PMC4361922)
Supplement: 330197_1_En_333_MOESM1_ESM.pdf [file 330197_1_En_333_MOESM1_ESM.pdf]

# Growth Charts for Individuals with Mucopolysaccharidosis VI (Maroteaux-Lamy syndrome)

Adrian Quartel,<sup>1</sup> Christian J Hendriksz,<sup>2</sup> Rossella Parini,<sup>3</sup> Sue Graham,<sup>1</sup> Ping Lin,<sup>1</sup> Paul Harmatz,<sup>4\*</sup> for the MPS VI Study Group

<sup>1</sup>BioMarin Pharmaceutical Inc., Novato, CA, USA

<sup>2</sup>Birmingham Children's Hospital, Birmingham, UK

<sup>3</sup>University Hospital San Gerardo, Monza, Italy

<sup>4</sup>Children's Hospital & Research Center Oakland, Oakland, CA, USA

## List of Supplement Tables and Figures

Supplement Table I: The height L, M and S parameters and percentiles for the MPS VI patients.

Supplement Table II: The height L, M and S parameters and percentiles for the MPS VI growth chart for rapidly progressing patients.

Supplement Table III: The height L, M and S parameters of the MPS VI growth chart for slowly progressing patients.

Supplement Table IV: Pre-ERT data points per patient by age category.

Supplement Figure 1: Standard Reference growth curves for MPS VI boys and girls.

Supplement Figure 2: Z-scores for age for MPS VI patients age 2-18 y and rapidly progressive disease

Supplement Figure 3: Z-scores for age for MPS VI patients age 2-18 y and slowly progressive disease.

Supplement Figure 4: Stature-for-age percentile chart for MPS VI patients

Supplement Figure 5: Stature-for-age percentile chart for rapidly progressing MPS VI patients

Supplement Figure 6: Stature-for-age percentile chart for slowly progressing MPS VI patients

**Supplement Table I: The height L, M and S parameters and percentiles for the MPS VI patients.**

| Age(y) | L, M and S VALUES <sup>1</sup> |          |            | PERCENTILES <sup>2</sup> |          |          |          |          |          |          |
|--------|--------------------------------|----------|------------|--------------------------|----------|----------|----------|----------|----------|----------|
|        | L                              | M        | S          | P5                       | P10      | P25      | P50      | P75      | P90      | P95      |
| 2      | 1                              | 81.36919 | 0.06481083 | 72.69489                 | 74.61079 | 77.8122  | 81.36919 | 84.92619 | 88.12759 | 90.0435  |
| 2.25   | 1                              | 82.65639 | 0.0646181  | 73.87106                 | 75.81149 | 79.05387 | 82.65639 | 86.2589  | 89.50128 | 91.44171 |
| 2.5    | 1                              | 83.8856  | 0.06459299 | 74.97309                 | 76.94162 | 80.23093 | 83.8856  | 87.54028 | 90.82959 | 92.79812 |
| 2.75   | 1                              | 85.05862 | 0.06474061 | 76.00083                 | 78.00144 | 81.34438 | 85.05862 | 88.77287 | 92.11581 | 94.11642 |
| 3      | 1                              | 86.17785 | 0.06506547 | 76.95482                 | 78.99193 | 82.39585 | 86.17785 | 89.95985 | 93.36377 | 95.40088 |
| 3.25   | 1                              | 87.24837 | 0.0655738  | 77.83782                 | 79.91634 | 83.38947 | 87.24837 | 91.10726 | 94.58039 | 96.65891 |
| 3.5    | 1                              | 88.27671 | 0.0662728  | 78.65375                 | 80.77919 | 84.33071 | 88.27671 | 92.22271 | 95.77423 | 97.89967 |
| 3.75   | 1                              | 89.26879 | 0.06716803 | 79.40623                 | 81.58459 | 85.22454 | 89.26879 | 93.31304 | 96.95299 | 99.13135 |
| 4      | 1                              | 90.22908 | 0.06826152 | 80.09814                 | 82.33578 | 86.07478 | 90.22908 | 94.38338 | 98.12238 | 100.36   |
| 4.25   | 1                              | 91.15981 | 0.06955215 | 80.73084                 | 83.03431 | 86.8833  | 91.15981 | 95.43631 | 99.2853  | 101.5888 |
| 4.5    | 1                              | 92.05885 | 0.07103531 | 81.30244                 | 83.67823 | 87.64807 | 92.05885 | 96.46962 | 100.4395 | 102.8152 |
| 4.75   | 1                              | 92.92538 | 0.07270177 | 81.81302                 | 84.26743 | 88.36864 | 92.92538 | 97.48213 | 101.5833 | 104.0378 |
| 5      | 1                              | 93.76058 | 0.07453863 | 82.26505                 | 84.80409 | 89.04671 | 93.76058 | 98.47445 | 102.7171 | 105.2561 |
| 5.25   | 1                              | 94.56493 | 0.07652945 | 82.66113                 | 85.29034 | 89.68365 | 94.56493 | 99.44622 | 103.8395 | 106.4687 |
| 5.5    | 1                              | 95.33762 | 0.07865356 | 83.00346                 | 85.72772 | 90.27987 | 95.33762 | 100.3954 | 104.9475 | 107.6718 |
| 5.75   | 1                              | 96.07639 | 0.08088714 | 83.29366                 | 86.117   | 90.83469 | 96.07639 | 101.3181 | 106.0358 | 108.8591 |
| 6      | 1                              | 96.77705 | 0.08320881 | 83.53153                 | 86.4571  | 91.34559 | 96.77705 | 102.2085 | 107.097  | 110.0226 |
| 6.25   | 1                              | 97.43992 | 0.08560631 | 83.71942                 | 86.74989 | 91.81368 | 97.43992 | 103.0662 | 108.1299 | 111.1604 |
| 6.5    | 1                              | 98.07092 | 0.08807736 | 83.86295                 | 87.00109 | 92.24479 | 98.07092 | 103.897  | 109.1407 | 112.2789 |
| 6.75   | 1                              | 98.67905 | 0.09062747 | 83.96907                 | 87.21809 | 92.64706 | 98.67905 | 104.711  | 110.14   | 113.389  |
| 7      | 1                              | 99.2724  | 0.09326012 | 84.04409                 | 87.40759 | 93.02787 | 99.2724  | 105.5169 | 111.1372 | 114.5007 |
| 7.25   | 1                              | 99.85715 | 0.09597361 | 84.09344                 | 87.5752  | 93.39307 | 99.85715 | 106.3212 | 112.1391 | 115.6208 |
| 7.5    | 1                              | 100.4381 | 0.09876106 | 84.12217                 | 87.72589 | 93.74757 | 100.4381 | 107.1286 | 113.1503 | 116.754  |
| 7.75   | 1                              | 101.0192 | 0.1016128  | 84.13503                 | 87.86427 | 94.09566 | 101.0192 | 107.9427 | 114.1741 | 117.9034 |
| 8      | 1                              | 101.6034 | 0.1045172  | 84.13625                 | 87.99426 | 94.44083 | 101.6034 | 108.7661 | 115.2126 | 119.0706 |

|       |   |          |           |          |          |          |          |          |          |          |
|-------|---|----------|-----------|----------|----------|----------|----------|----------|----------|----------|
| 8.25  | 1 | 102.1926 | 0.1074646 | 84.12866 | 88.11848 | 94.78528 | 102.1926 | 109.5999 | 116.2667 | 120.2565 |
| 8.5   | 1 | 102.7875 | 0.1104477 | 84.1141  | 88.23854 | 95.13029 | 102.7875 | 110.4448 | 117.3365 | 121.461  |
| 8.75  | 1 | 103.3889 | 0.1134592 | 84.09406 | 88.35574 | 95.47683 | 103.3889 | 111.3009 | 118.422  | 122.6837 |
| 9     | 1 | 103.9959 | 0.1164902 | 84.06931 | 88.47054 | 95.82479 | 103.9959 | 112.167  | 119.5213 | 123.9225 |
| 9.25  | 1 | 104.6073 | 0.1195303 | 84.04049 | 88.58313 | 96.17368 | 104.6073 | 113.041  | 120.6315 | 125.1742 |
| 9.5   | 1 | 105.2216 | 0.1225674 | 84.00836 | 88.69378 | 96.5229  | 105.2216 | 113.9203 | 121.7495 | 126.4349 |
| 9.75  | 1 | 105.8392 | 0.1255905 | 83.97516 | 88.80431 | 96.87363 | 105.8392 | 114.8048 | 122.8741 | 127.7033 |
| 10    | 1 | 106.4609 | 0.1285891 | 83.94331 | 88.91681 | 97.2273  | 106.4609 | 115.6944 | 124.0049 | 128.9784 |
| 10.25 | 1 | 107.0862 | 0.131552  | 83.91445 | 89.03243 | 97.58436 | 107.0862 | 116.588  | 125.1399 | 130.2579 |
| 10.5  | 1 | 107.7145 | 0.1344703 | 83.88981 | 89.15202 | 97.94495 | 107.7145 | 117.4841 | 126.277  | 131.5392 |
| 10.75 | 1 | 108.3477 | 0.1373385 | 83.87177 | 89.27782 | 98.31109 | 108.3477 | 118.3843 | 127.4176 | 132.8236 |
| 11    | 1 | 108.9883 | 0.1401542 | 83.86285 | 89.41235 | 98.68533 | 108.9883 | 119.2912 | 128.5642 | 134.1137 |
| 11.25 | 1 | 109.6384 | 0.1429149 | 83.86526 | 89.55783 | 99.06986 | 109.6384 | 120.207  | 129.719  | 135.4116 |
| 11.5  | 1 | 110.2999 | 0.1456173 | 83.88093 | 89.71613 | 99.46649 | 110.2999 | 121.1332 | 130.8836 | 136.7188 |
| 11.75 | 1 | 110.9741 | 0.1482561 | 83.912   | 89.88926 | 99.877   | 110.9741 | 122.0712 | 132.0589 | 138.0362 |
| 12    | 1 | 111.6625 | 0.150825  | 83.96073 | 90.07928 | 100.3031 | 111.6625 | 123.022  | 133.2458 | 139.3643 |
| 12.25 | 1 | 112.366  | 0.153317  | 84.0291  | 90.28793 | 100.7462 | 112.366  | 123.9859 | 134.4441 | 140.7029 |
| 12.5  | 1 | 113.0847 | 0.1557248 | 84.11866 | 90.51644 | 101.2069 | 113.0847 | 124.9625 | 135.6529 | 142.0507 |
| 12.75 | 1 | 113.818  | 0.1580396 | 84.23081 | 90.7658  | 101.6855 | 113.818  | 125.9506 | 136.8703 | 143.4053 |
| 13    | 1 | 114.5648 | 0.160251  | 84.36668 | 91.03659 | 102.1817 | 114.5648 | 126.9478 | 138.0929 | 144.7628 |
| 13.25 | 1 | 115.3229 | 0.1623478 | 84.52724 | 91.32913 | 102.6948 | 115.3229 | 127.951  | 139.3166 | 146.1185 |
| 13.5  | 1 | 116.0902 | 0.1643188 | 84.71329 | 91.64356 | 103.2237 | 116.0902 | 128.9566 | 140.5368 | 147.4671 |
| 13.75 | 1 | 116.8651 | 0.1661557 | 84.92563 | 91.98016 | 103.768  | 116.8651 | 129.9622 | 141.75   | 148.8045 |
| 14    | 1 | 117.6471 | 0.1678522 | 85.16567 | 92.33992 | 104.3278 | 117.6471 | 130.9665 | 142.9544 | 150.1286 |
| 14.25 | 1 | 118.436  | 0.1694014 | 85.43494 | 92.72396 | 104.9036 | 118.436  | 131.9685 | 144.1481 | 151.4371 |
| 14.5  | 1 | 119.231  | 0.1707964 | 85.73481 | 93.13317 | 105.4955 | 119.231  | 132.9664 | 145.3288 | 152.7271 |
| 14.75 | 1 | 120.0315 | 0.1720309 | 86.06667 | 93.56854 | 106.1038 | 120.0315 | 133.9591 | 146.4944 | 153.9962 |
| 15    | 1 | 120.8366 | 0.1730988 | 86.43173 | 94.03079 | 106.7285 | 120.8366 | 134.9447 | 147.6424 | 155.2414 |
| 15.25 | 1 | 121.6447 | 0.1739928 | 86.83088 | 94.52027 | 107.3689 | 121.6447 | 135.9205 | 148.7691 | 156.4585 |

|       |   |          |           |          |          |          |          |          |          |          |
|-------|---|----------|-----------|----------|----------|----------|----------|----------|----------|----------|
| 15.5  | 1 | 122.4539 | 0.174706  | 87.26482 | 95.03709 | 108.0242 | 122.4539 | 136.8835 | 149.8707 | 157.6429 |
| 15.75 | 1 | 123.2624 | 0.1752332 | 87.73413 | 95.58134 | 108.6937 | 123.2624 | 137.8312 | 150.9435 | 158.7907 |
| 16    | 1 | 124.0689 | 0.1755694 | 88.23952 | 96.15322 | 109.3767 | 124.0689 | 138.7611 | 151.9845 | 159.8982 |
| 16.25 | 1 | 124.8727 | 0.1757111 | 88.78214 | 96.75353 | 110.0734 | 124.8727 | 139.6721 | 152.9919 | 160.9633 |
| 16.5  | 1 | 125.6744 | 0.1756596 | 89.36274 | 97.38296 | 110.7844 | 125.6744 | 140.5643 | 153.9658 | 161.986  |
| 16.75 | 1 | 126.4743 | 0.1754179 | 89.98183 | 98.04199 | 111.5102 | 126.4743 | 141.4384 | 154.9066 | 162.9668 |
| 17    | 1 | 127.273  | 0.17499   | 90.63966 | 98.73094 | 112.2511 | 127.273  | 142.2949 | 155.8151 | 163.9064 |
| 17.25 | 1 | 128.0705 | 0.1743796 | 91.33619 | 99.44978 | 113.0072 | 128.0705 | 143.1338 | 156.6913 | 164.8049 |
| 17.5  | 1 | 128.8668 | 0.173591  | 92.0712  | 100.1983 | 113.7783 | 128.8668 | 143.9552 | 157.5352 | 165.6623 |
| 17.75 | 1 | 129.6612 | 0.1726293 | 92.84394 | 100.9758 | 114.5639 | 129.6612 | 144.7586 | 158.3466 | 166.4785 |
| 18    | 1 | 130.4529 | 0.1715012 | 93.65283 | 101.7809 | 115.3626 | 130.4529 | 145.5431 | 159.1248 | 167.2529 |

<sup>1</sup>Expressed as equivalent degrees of freedom, *edf*

<sup>2</sup>The percentile data is represented in graphic form in Supplement Figure 4.

**Supplement Table II: The height L, M and S parameters and percentiles for the MPS VI growth chart for rapidly progressing patients.**

| Age(y) | L, M and S VALUES <sup>1</sup> |          |            | PERCENTILES <sup>2</sup> |          |          |          |          |          |          |
|--------|--------------------------------|----------|------------|--------------------------|----------|----------|----------|----------|----------|----------|
|        | L                              | M        | S          | P5                       | P10      | P25      | P50      | P75      | P90      | P95      |
| 2      | 1                              | 81.06272 | 0.06395017 | 72.53584                 | 74.41919 | 77.56618 | 81.06272 | 84.55926 | 87.70625 | 89.5896  |
| 2.25   | 1                              | 82.16033 | 0.0650672  | 73.36703                 | 75.30923 | 78.55455 | 82.16033 | 85.76611 | 89.01144 | 90.95363 |
| 2.5    | 1                              | 83.22474 | 0.06618438 | 74.1646                  | 76.16573 | 79.50953 | 83.22474 | 86.93995 | 90.28375 | 92.28488 |
| 2.75   | 1                              | 84.25546 | 0.06730174 | 74.92825                 | 76.98837 | 80.43074 | 84.25546 | 88.08018 | 91.52255 | 93.58267 |
| 3      | 1                              | 85.25226 | 0.06841928 | 75.658                   | 77.7771  | 81.31803 | 85.25226 | 89.18649 | 92.72742 | 94.84652 |
| 3.25   | 1                              | 86.21501 | 0.06953702 | 76.35389                 | 78.53194 | 82.17136 | 86.21501 | 90.25867 | 93.89809 | 96.07613 |
| 3.5    | 1                              | 87.14365 | 0.07065498 | 77.01607                 | 79.25297 | 82.99073 | 87.14365 | 91.29658 | 95.03434 | 97.27124 |
| 3.75   | 1                              | 88.03795 | 0.07177316 | 77.64451                 | 79.94013 | 83.77601 | 88.03795 | 92.29989 | 96.13577 | 98.43139 |
| 4      | 1                              | 88.89737 | 0.07289157 | 78.23894                 | 80.59309 | 84.52676 | 88.89737 | 93.26797 | 97.20165 | 99.5558  |
| 4.25   | 1                              | 89.72119 | 0.07401023 | 78.7989                  | 81.21132 | 85.24239 | 89.72119 | 94.2     | 98.23106 | 100.6435 |
| 4.5    | 1                              | 90.50886 | 0.07512914 | 79.3241                  | 81.79449 | 85.92242 | 90.50886 | 95.09529 | 99.22322 | 101.6936 |
| 4.75   | 1                              | 91.26132 | 0.0762483  | 79.81557                 | 82.34362 | 86.56787 | 91.26132 | 95.95477 | 100.179  | 102.7071 |
| 5      | 1                              | 91.98039 | 0.07736773 | 80.2751                  | 82.86047 | 87.18051 | 91.98039 | 96.78027 | 101.1003 | 103.6857 |
| 5.25   | 1                              | 92.66786 | 0.07848743 | 80.70441                 | 83.3468  | 87.76212 | 92.66786 | 97.5736  | 101.9889 | 104.6313 |
| 5.5    | 1                              | 93.32539 | 0.0796074  | 81.10513                 | 83.80424 | 88.31435 | 93.32539 | 98.33644 | 102.8465 | 105.5457 |
| 5.75   | 1                              | 93.95466 | 0.08072764 | 81.47887                 | 84.23443 | 88.83883 | 93.95466 | 99.07049 | 103.6749 | 106.4304 |
| 6      | 1                              | 94.55703 | 0.08184815 | 81.82699                 | 84.63869 | 89.33694 | 94.55703 | 99.77712 | 104.4754 | 107.2871 |
| 6.25   | 1                              | 95.13457 | 0.08296894 | 82.15138                 | 85.019   | 89.81068 | 95.13457 | 100.4585 | 105.2501 | 108.1178 |
| 6.5    | 1                              | 95.68968 | 0.08408999 | 82.45429                 | 85.37762 | 90.26237 | 95.68968 | 101.117  | 106.0017 | 108.9251 |
| 6.75   | 1                              | 96.2245  | 0.08521132 | 82.73766                 | 85.71653 | 90.69408 | 96.2245  | 101.7549 | 106.7325 | 109.7113 |
| 7      | 1                              | 96.74097 | 0.08633292 | 83.00327                 | 86.03754 | 91.10767 | 96.74097 | 102.3743 | 107.4444 | 110.4787 |
| 7.25   | 1                              | 97.24067 | 0.08745477 | 83.25257                 | 86.34215 | 91.5047  | 97.24067 | 102.9766 | 108.1392 | 111.2288 |
| 7.5    | 1                              | 97.72486 | 0.08857687 | 83.48674                 | 86.63155 | 91.88637 | 97.72486 | 103.5634 | 108.8182 | 111.963  |
| 7.75   | 1                              | 98.19465 | 0.08969919 | 83.70681                 | 86.90677 | 92.25375 | 98.19465 | 104.1355 | 109.4825 | 112.6825 |
| 8      | 1                              | 98.65096 | 0.09082172 | 83.91364                 | 87.1687  | 92.60777 | 98.65096 | 104.6941 | 110.1332 | 113.3883 |

|       |   |          |            |          |          |          |          |          |          |          |
|-------|---|----------|------------|----------|----------|----------|----------|----------|----------|----------|
| 8.25  | 1 | 99.09435 | 0.09194445 | 84.1078  | 87.41791 | 92.94896 | 99.09435 | 105.2397 | 110.7708 | 114.0809 |
| 8.5   | 1 | 99.52515 | 0.09306736 | 84.28963 | 87.65472 | 93.27766 | 99.52515 | 105.7726 | 111.3956 | 114.7607 |
| 8.75  | 1 | 99.94312 | 0.09419043 | 84.45899 | 87.879   | 93.59369 | 99.94312 | 106.2926 | 112.0072 | 115.4273 |
| 9     | 1 | 100.3475 | 0.09531365 | 84.61529 | 88.09008 | 93.89632 | 100.3475 | 106.7986 | 112.6048 | 116.0796 |
| 9.25  | 1 | 100.7371 | 0.09643701 | 84.75774 | 88.28713 | 94.18461 | 100.7371 | 107.2897 | 113.1871 | 116.7165 |
| 9.5   | 1 | 101.1112 | 0.09756049 | 84.88565 | 88.46943 | 94.45776 | 101.1112 | 107.7647 | 113.7531 | 117.3368 |
| 9.75  | 1 | 101.4694 | 0.09868407 | 84.99879 | 88.63668 | 94.71544 | 101.4694 | 108.2233 | 114.3021 | 117.94   |
| 10    | 1 | 101.8113 | 0.09980773 | 85.09705 | 88.78876 | 94.95746 | 101.8113 | 108.6652 | 114.8339 | 118.5256 |
| 10.25 | 1 | 102.1364 | 0.1009315  | 85.17998 | 88.92518 | 95.18324 | 102.1364 | 109.0896 | 115.3476 | 119.0928 |
| 10.5  | 1 | 102.4441 | 0.1020552  | 85.24721 | 89.04551 | 95.39232 | 102.4441 | 109.4958 | 115.8426 | 119.6409 |
| 10.75 | 1 | 102.7347 | 0.1031791  | 85.29917 | 89.1502  | 95.5851  | 102.7347 | 109.8844 | 116.3193 | 120.1703 |
| 11    | 1 | 103.0087 | 0.1043029  | 85.33623 | 89.23958 | 95.76192 | 103.0087 | 110.2555 | 116.7778 | 120.6812 |
| 11.25 | 1 | 103.2663 | 0.1054268  | 85.3587  | 89.31398 | 95.92309 | 103.2663 | 110.6095 | 117.2186 | 121.1739 |
| 11.5  | 1 | 103.508  | 0.1065508  | 85.36716 | 89.37396 | 96.06916 | 103.508  | 110.9469 | 117.6421 | 121.6489 |
| 11.75 | 1 | 103.7354 | 0.1076747  | 85.36292 | 89.42089 | 96.20158 | 103.7354 | 111.2692 | 118.0499 | 122.1079 |
| 12    | 1 | 103.9507 | 0.1087987  | 85.34785 | 89.45669 | 96.32238 | 103.9507 | 111.5789 | 118.4446 | 122.5535 |
| 12.25 | 1 | 104.1558 | 0.1099228  | 85.32375 | 89.48323 | 96.43354 | 104.1558 | 111.8781 | 118.8284 | 122.9879 |
| 12.5  | 1 | 104.3531 | 0.1110468  | 85.29237 | 89.50233 | 96.53701 | 104.3531 | 112.1691 | 119.2038 | 123.4137 |
| 12.75 | 1 | 104.5444 | 0.1121709  | 85.25548 | 89.51587 | 96.63479 | 104.5444 | 112.4541 | 119.573  | 123.8334 |
| 13    | 1 | 104.732  | 0.1132951  | 85.21478 | 89.52557 | 96.72874 | 104.732  | 112.7352 | 119.9384 | 124.2492 |
| 13.25 | 1 | 104.9176 | 0.1144193  | 85.17181 | 89.53311 | 96.82065 | 104.9176 | 113.0146 | 120.3021 | 124.6634 |
| 13.5  | 1 | 105.1031 | 0.1155435  | 85.12801 | 89.53993 | 96.91209 | 105.1031 | 113.2941 | 120.6662 | 125.0781 |
| 13.75 | 1 | 105.2895 | 0.1166678  | 85.08432 | 89.54709 | 97.00418 | 105.2895 | 113.5749 | 121.032  | 125.4948 |
| 14    | 1 | 105.4782 | 0.1177922  | 85.04168 | 89.55553 | 97.09797 | 105.4782 | 113.8584 | 121.4008 | 125.9146 |
| 14.25 | 1 | 105.6701 | 0.1189165  | 85.00095 | 89.56618 | 97.19447 | 105.6701 | 114.1456 | 121.7739 | 126.3391 |
| 14.5  | 1 | 105.8661 | 0.120041   | 84.96282 | 89.57976 | 97.29446 | 105.8661 | 114.4377 | 122.1524 | 126.7693 |
| 14.75 | 1 | 106.067  | 0.1211655  | 84.92789 | 89.59692 | 97.39867 | 106.067  | 114.7353 | 122.537  | 127.2061 |
| 15    | 1 | 106.2735 | 0.12229    | 84.89667 | 89.6182  | 97.5077  | 106.2735 | 115.0393 | 122.9288 | 127.6503 |
| 15.25 | 1 | 106.4862 | 0.1234146  | 84.86961 | 89.64411 | 97.62209 | 106.4862 | 115.3503 | 123.3283 | 128.1028 |

|       |   |          |           |          |          |          |          |          |          |          |
|-------|---|----------|-----------|----------|----------|----------|----------|----------|----------|----------|
| 15.5  | 1 | 106.7057 | 0.1245393 | 84.84718 | 89.67512 | 97.7424  | 106.7057 | 115.6691 | 123.7363 | 128.5643 |
| 15.75 | 1 | 106.9323 | 0.125664  | 84.82953 | 89.71141 | 97.86883 | 106.9323 | 115.9958 | 124.1532 | 129.0351 |
| 16    | 1 | 107.1663 | 0.1267887 | 84.81686 | 89.75322 | 98.00166 | 107.1663 | 116.3309 | 124.5793 | 129.5157 |
| 16.25 | 1 | 107.4078 | 0.1279135 | 84.80935 | 89.80072 | 98.14109 | 107.4078 | 116.6746 | 125.015  | 130.0063 |
| 16.5  | 1 | 107.657  | 0.1290383 | 84.8069  | 89.85384 | 98.28707 | 107.657  | 117.0269 | 125.4602 | 130.5071 |
| 16.75 | 1 | 107.9134 | 0.1301631 | 84.80919 | 89.91225 | 98.43925 | 107.9134 | 117.3875 | 125.9145 | 131.0175 |
| 17    | 1 | 108.1764 | 0.131288  | 84.81578 | 89.97549 | 98.59715 | 108.1764 | 117.7557 | 126.3774 | 131.5371 |
| 17.25 | 1 | 108.4457 | 0.1324129 | 84.82626 | 90.04314 | 98.76031 | 108.4457 | 118.1311 | 126.8483 | 132.0652 |
| 17.5  | 1 | 108.7207 | 0.1335379 | 84.84014 | 90.11468 | 98.9282  | 108.7207 | 118.5131 | 127.3267 | 132.6012 |
| 17.75 | 1 | 109.0004 | 0.1346628 | 84.85677 | 90.18943 | 99.10007 | 109.0004 | 118.9008 | 127.8114 | 133.1441 |
| 18    | 1 | 109.2842 | 0.1357878 | 84.87548 | 90.26669 | 99.27516 | 109.2842 | 119.2933 | 128.3018 | 133.693  |

<sup>1</sup>Expressed as equivalent degrees of freedom, *edf*

<sup>2</sup>The percentile data is represented in graphic form in Supplement Figure 5.

**Supplement Table III: The height L, M and S parameters of the MPS VI growth chart for slowly progressing patients.**

| Age(y) | L, M and S VALUES <sup>1</sup> |          |            | PERCENTILES <sup>2</sup> |          |          |          |          |          |          |
|--------|--------------------------------|----------|------------|--------------------------|----------|----------|----------|----------|----------|----------|
|        | L                              | M        | S          | P5                       | P10      | P25      | P50      | P75      | P90      | P95      |
| 2      | 1                              | 80.59758 | 0.06553924 | 71.90897                 | 73.82803 | 77.03472 | 80.59758 | 84.16044 | 87.36713 | 89.28619 |
| 2.25   | 1                              | 81.99123 | 0.06675318 | 72.98866                 | 74.97707 | 78.29964 | 81.99123 | 85.68283 | 89.00539 | 90.9938  |
| 2.5    | 1                              | 83.38334 | 0.06797309 | 74.0606                  | 76.11973 | 79.56045 | 83.38334 | 87.20623 | 90.64695 | 92.70608 |
| 2.75   | 1                              | 84.77369 | 0.06919891 | 75.12457                 | 77.25579 | 80.81696 | 84.77369 | 88.73042 | 92.29159 | 94.42281 |
| 3      | 1                              | 86.16216 | 0.07043056 | 76.18044                 | 78.38512 | 82.06905 | 86.16216 | 90.25526 | 93.93919 | 96.14387 |
| 3.25   | 1                              | 87.54995 | 0.07166882 | 77.22915                 | 79.50872 | 83.31779 | 87.54995 | 91.7821  | 95.59118 | 97.87075 |
| 3.5    | 1                              | 88.93905 | 0.07291494 | 78.2722                  | 80.6282  | 84.56499 | 88.93905 | 93.3131  | 97.24989 | 99.6059  |
| 3.75   | 1                              | 90.33142 | 0.07417015 | 79.31107                 | 81.74516 | 85.81241 | 90.33142 | 94.85043 | 98.91768 | 101.3518 |
| 4      | 1                              | 91.72903 | 0.07543569 | 80.34724                 | 82.86115 | 87.06181 | 91.72903 | 96.39626 | 100.5969 | 103.1108 |
| 4.25   | 1                              | 93.13269 | 0.07671227 | 81.38116                 | 83.97675 | 88.31385 | 93.13269 | 97.95153 | 102.2886 | 104.8842 |
| 4.5    | 1                              | 94.54057 | 0.0779996  | 82.41122                 | 85.09025 | 89.5668  | 94.54057 | 99.51434 | 103.9909 | 106.6699 |
| 4.75   | 1                              | 95.94949 | 0.07929622 | 83.43474                 | 86.1989  | 90.81768 | 95.94949 | 101.0813 | 105.7001 | 108.4642 |
| 5      | 1                              | 97.35614 | 0.08060002 | 84.44913                 | 87.29993 | 92.06348 | 97.35614 | 102.6488 | 107.4124 | 110.2632 |
| 5.25   | 1                              | 98.75706 | 0.08190876 | 85.45172                 | 88.3905  | 93.30106 | 98.75706 | 104.2131 | 109.1236 | 112.0624 |
| 5.5    | 1                              | 100.1487 | 0.08322016 | 86.43986                 | 89.46776 | 94.52725 | 100.1487 | 105.7702 | 110.8297 | 113.8576 |
| 5.75   | 1                              | 101.5275 | 0.08453196 | 87.41082                 | 90.52879 | 95.73879 | 101.5275 | 107.3162 | 112.5262 | 115.6441 |
| 6      | 1                              | 102.8894 | 0.08584187 | 88.36169                 | 91.57045 | 96.93215 | 102.8894 | 108.8466 | 114.2083 | 117.4171 |
| 6.25   | 1                              | 104.2311 | 0.08714812 | 89.29003                 | 92.5901  | 98.10438 | 104.2311 | 110.3579 | 115.8722 | 119.1722 |
| 6.5    | 1                              | 105.5511 | 0.08844972 | 90.19477                 | 93.58655 | 99.25405 | 105.5511 | 111.8481 | 117.5156 | 120.9074 |
| 6.75   | 1                              | 106.8491 | 0.08974654 | 91.076                   | 94.55983 | 100.3811 | 106.8491 | 113.317  | 119.1383 | 122.6221 |
| 7      | 1                              | 108.1252 | 0.09103859 | 91.93394                 | 95.51013 | 101.4858 | 108.1252 | 114.7645 | 120.7402 | 124.3164 |
| 7.25   | 1                              | 109.3795 | 0.09232583 | 92.76885                 | 96.43768 | 102.5681 | 109.3795 | 116.1909 | 122.3213 | 125.9901 |
| 7.5    | 1                              | 110.612  | 0.09360779 | 93.58096                 | 97.34265 | 103.6283 | 110.612  | 117.5958 | 123.8814 | 127.6431 |
| 7.75   | 1                              | 111.8227 | 0.09488368 | 94.37054                 | 98.22523 | 104.6662 | 111.8227 | 118.9791 | 125.4201 | 129.2748 |
| 8      | 1                              | 113.0114 | 0.09615269 | 95.13784                 | 99.0856  | 105.6822 | 113.0114 | 120.3406 | 126.9372 | 130.8849 |



|       |   |          |            |          |          |          |          |          |          |          |
|-------|---|----------|------------|----------|----------|----------|----------|----------|----------|----------|
| 8.25  | 1 | 114.1781 | 0.09741397 | 95.88313 | 99.92397 | 106.676  | 114.1781 | 121.6801 | 128.4322 | 132.473  |
| 8.5   | 1 | 115.3227 | 0.09866666 | 96.60673 | 100.7406 | 107.648  | 115.3227 | 122.9974 | 129.9048 | 134.0387 |
| 8.75  | 1 | 116.4452 | 0.09990939 | 97.30904 | 101.5357 | 108.5982 | 116.4452 | 124.2922 | 131.3548 | 135.5814 |
| 9     | 1 | 117.5453 | 0.1011404  | 97.99036 | 102.3095 | 109.5266 | 117.5453 | 125.5641 | 132.7812 | 137.1003 |
| 9.25  | 1 | 118.6229 | 0.1023577  | 98.65112 | 103.0623 | 110.4333 | 118.6229 | 126.8125 | 134.1834 | 138.5946 |
| 9.5   | 1 | 119.6777 | 0.1035591  | 99.29186 | 103.7945 | 111.3183 | 119.6777 | 128.0372 | 135.5609 | 140.0636 |
| 9.75  | 1 | 120.7102 | 0.1047421  | 99.91356 | 104.5069 | 112.1823 | 120.7102 | 129.238  | 136.9134 | 141.5068 |
| 10    | 1 | 121.7206 | 0.105904   | 100.5173 | 105.2005 | 113.026  | 121.7206 | 130.4153 | 138.2407 | 142.9239 |
| 10.25 | 1 | 122.7094 | 0.107042   | 101.1042 | 105.8762 | 113.85   | 122.7094 | 131.5689 | 139.5427 | 144.3147 |
| 10.5  | 1 | 123.6771 | 0.1081529  | 101.6754 | 106.535  | 114.6551 | 123.6771 | 132.6991 | 140.8191 | 145.6787 |
| 10.75 | 1 | 124.6243 | 0.1092335  | 102.2327 | 107.1784 | 115.4424 | 124.6243 | 133.8062 | 142.0703 | 147.016  |
| 11    | 1 | 125.5522 | 0.1102801  | 102.7777 | 107.808  | 116.2133 | 125.5522 | 134.8911 | 143.2965 | 148.3267 |
| 11.25 | 1 | 126.4616 | 0.111289   | 103.3123 | 108.4254 | 116.969  | 126.4616 | 135.9543 | 144.4979 | 149.611  |
| 11.5  | 1 | 127.3535 | 0.1122564  | 103.8383 | 109.0321 | 117.7108 | 127.3535 | 136.9962 | 145.6749 | 150.8687 |
| 11.75 | 1 | 128.2286 | 0.1131785  | 104.3573 | 109.6298 | 118.44   | 128.2286 | 138.0173 | 146.8274 | 152.0999 |
| 12    | 1 | 129.0878 | 0.1140513  | 104.8712 | 110.22   | 119.1575 | 129.0878 | 139.0181 | 147.9556 | 153.3044 |
| 12.25 | 1 | 129.9316 | 0.114871   | 105.3816 | 110.804  | 119.8646 | 129.9316 | 139.9987 | 149.0593 | 154.4817 |
| 12.5  | 1 | 130.7603 | 0.1156333  | 105.8897 | 111.3829 | 120.5619 | 130.7603 | 140.9588 | 150.1377 | 155.6309 |
| 12.75 | 1 | 131.5737 | 0.1163344  | 106.3967 | 111.9576 | 121.2496 | 131.5737 | 141.8979 | 151.1899 | 156.7508 |
| 13    | 1 | 132.3716 | 0.1169706  | 106.9034 | 112.5286 | 121.9281 | 132.3716 | 142.8151 | 152.2146 | 157.8398 |
| 13.25 | 1 | 133.1533 | 0.1175386  | 107.4102 | 113.0962 | 122.5971 | 133.1533 | 143.7095 | 153.2104 | 158.8963 |
| 13.5  | 1 | 133.9181 | 0.1180353  | 107.9178 | 113.6605 | 123.2564 | 133.9181 | 144.5798 | 154.1756 | 159.9184 |
| 13.75 | 1 | 134.6656 | 0.1184576  | 108.4266 | 114.2221 | 123.906  | 134.6656 | 145.4252 | 155.1091 | 160.9046 |
| 14    | 1 | 135.3956 | 0.1188023  | 108.9376 | 114.7814 | 124.5462 | 135.3956 | 146.245  | 156.0098 | 161.8536 |
| 14.25 | 1 | 136.1078 | 0.1190659  | 109.4517 | 115.3393 | 125.1772 | 136.1078 | 147.0385 | 156.8764 | 162.764  |
| 14.5  | 1 | 136.8018 | 0.1192449  | 109.9695 | 115.896  | 125.7989 | 136.8018 | 147.8047 | 157.7077 | 163.6342 |
| 14.75 | 1 | 137.4764 | 0.1193378  | 110.4908 | 116.4511 | 126.4107 | 137.4764 | 148.5422 | 158.5017 | 164.4621 |
| 15    | 1 | 138.1302 | 0.1193436  | 111.0149 | 117.0039 | 127.0113 | 138.1302 | 149.2492 | 159.2566 | 165.2456 |
| 15.25 | 1 | 138.7617 | 0.1192616  | 111.5411 | 117.5534 | 127.5996 | 138.7617 | 149.9238 | 159.9701 | 165.9823 |

|       |   |          |           |          |          |          |          |          |          |          |
|-------|---|----------|-----------|----------|----------|----------|----------|----------|----------|----------|
| 15.5  | 1 | 139.3696 | 0.1190907 | 112.0689 | 118.0989 | 128.1746 | 139.3696 | 150.5645 | 160.6402 | 166.6702 |
| 15.75 | 1 | 139.9527 | 0.1188297 | 112.5979 | 118.6398 | 128.7356 | 139.9527 | 151.1699 | 161.2656 | 167.3075 |
| 16    | 1 | 140.5105 | 0.1184778 | 113.128  | 119.176  | 129.282  | 140.5105 | 151.7389 | 161.8449 | 167.8929 |
| 16.25 | 1 | 141.0423 | 0.118034  | 113.6591 | 119.7073 | 129.8135 | 141.0423 | 152.2711 | 162.3773 | 168.4255 |
| 16.5  | 1 | 141.5489 | 0.1174991 | 114.1919 | 120.2343 | 130.3309 | 141.5489 | 152.7669 | 162.8635 | 168.9059 |
| 16.75 | 1 | 142.0312 | 0.1168748 | 114.7269 | 120.7576 | 130.8348 | 142.0312 | 153.2277 | 163.3048 | 169.3356 |
| 17    | 1 | 142.4903 | 0.116163  | 115.2645 | 121.2779 | 131.3261 | 142.4903 | 153.6545 | 163.7027 | 169.7161 |
| 17.25 | 1 | 142.9272 | 0.1153656 | 115.8054 | 121.7959 | 131.8056 | 142.9272 | 154.0488 | 164.0586 | 170.049  |
| 17.5  | 1 | 143.3432 | 0.1144845 | 116.3502 | 122.3122 | 132.2744 | 143.3432 | 154.4119 | 164.3742 | 170.3362 |
| 17.75 | 1 | 143.7395 | 0.1135215 | 116.8995 | 122.8277 | 132.7335 | 143.7395 | 154.7455 | 164.6512 | 170.5794 |
| 18    | 1 | 144.1177 | 0.1124789 | 117.4543 | 123.3435 | 133.1841 | 144.1177 | 155.0513 | 164.8919 | 170.7811 |

<sup>1</sup>Expressed as equivalent degrees of freedom, *edf*

<sup>2</sup>The percentile data is represented in graphic form in Supplement Figure 6.

**Supplement Table IV: Pre-ERT data points per patient by age category.**

| Age Groups (years) <sup>1</sup> | Number of Patients | Number of pre-ERT data points | Min and Max data points per patient | Mean (SD) data points per patient | Median number of data points per patient |
|---------------------------------|--------------------|-------------------------------|-------------------------------------|-----------------------------------|------------------------------------------|
| <2                              | 14                 | 26                            | 1-7                                 | 1.9(1.7)                          | 1                                        |
| ≤4                              | 26                 | 46                            | 1-10                                | 1.8(1.8)                          | 1                                        |
| >4 to ≤7                        | 49                 | 75                            | 1-9                                 | 1.5(1.4)                          | 1                                        |
| >7 to ≤10                       | 47                 | 103                           | 1-8                                 | 2.2(1.8)                          | 1                                        |
| >10 to ≤13                      | 37                 | 84                            | 1-7                                 | 2.3(1.9)                          | 1                                        |
| >13 to ≤18                      | 49                 | 114                           | 1-36                                | 2.3(5.1)                          | 1                                        |
| >18 to ≤25                      | 34                 | 91                            | 1-41                                | 2.7(6.9)                          | 1                                        |
| >25                             | 24                 | 45                            | 1-6                                 | 1.9(1.2)                          | 1.5                                      |
|                                 |                    |                               |                                     |                                   |                                          |
| 2-18                            | 172                | 396                           | 1-36                                | 2.3(3.2)                          | 1                                        |
| ≤25                             | 207                | 513                           | 1-77                                | 2.5(5.5)                          | 1                                        |

<sup>1</sup>The number of patients for age range 2-18y in this Table is 172 instead of 168 (Table I) because some of the patients were counted more than once when the patients were stratified by age for this table. These patients provided height measurements across >1 age range in this table.

**Supplement Figure 1: Reference growth curves for MPS VI boys and girls.**

Height for age measurements for boys (blue) and girls (red) are plotted per baseline uGAG levels (dotted lines for those with low baseline uGAG levels and dotted-dashed lines for high baseline uGAG levels.)

Growth curve for the combined population is indicated by solid lines: blue line for boys and red for girls.

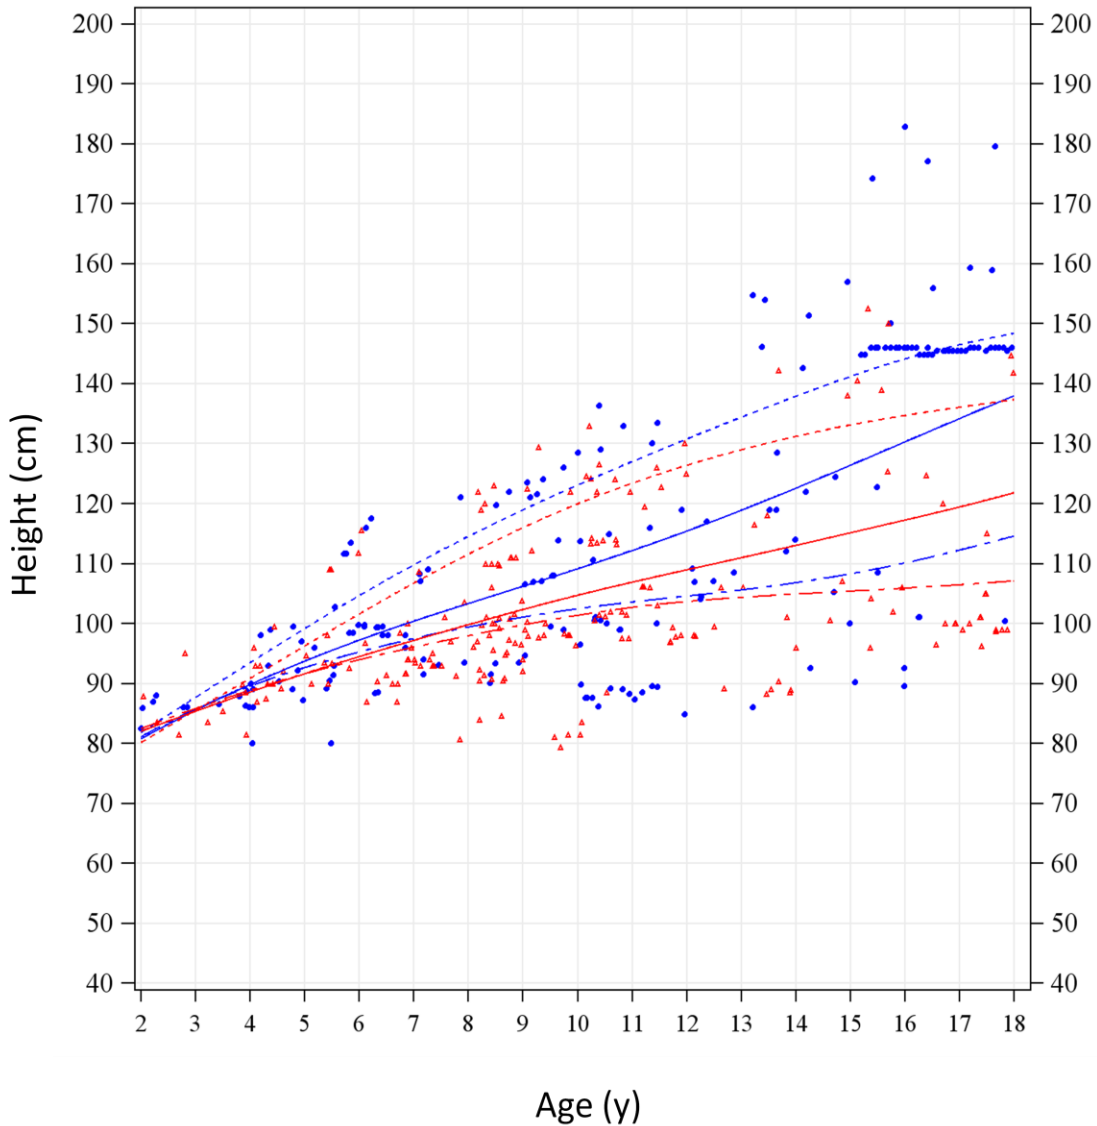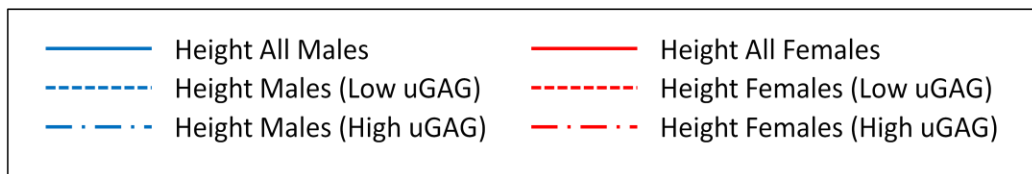

**Supplement Figure 2: Z-scores for age for MPS VI patients age 2-18 y and rapidly progressive disease.**

The reference growth curves for rapidly progressing MPS VI patients (Figure 2) was used to plot z-scores of patients with pre-ERT uGAG levels of >200 µg/mg creatinine. All available pre-ERT (or those obtained within 1 month of ERT) height measurements were plotted with some patients contributing >1 data point as described in the methods. The number of baseline visits within +2 and -2 SD were 243 of 268 (90.7%) for the rapidly progressing patients.

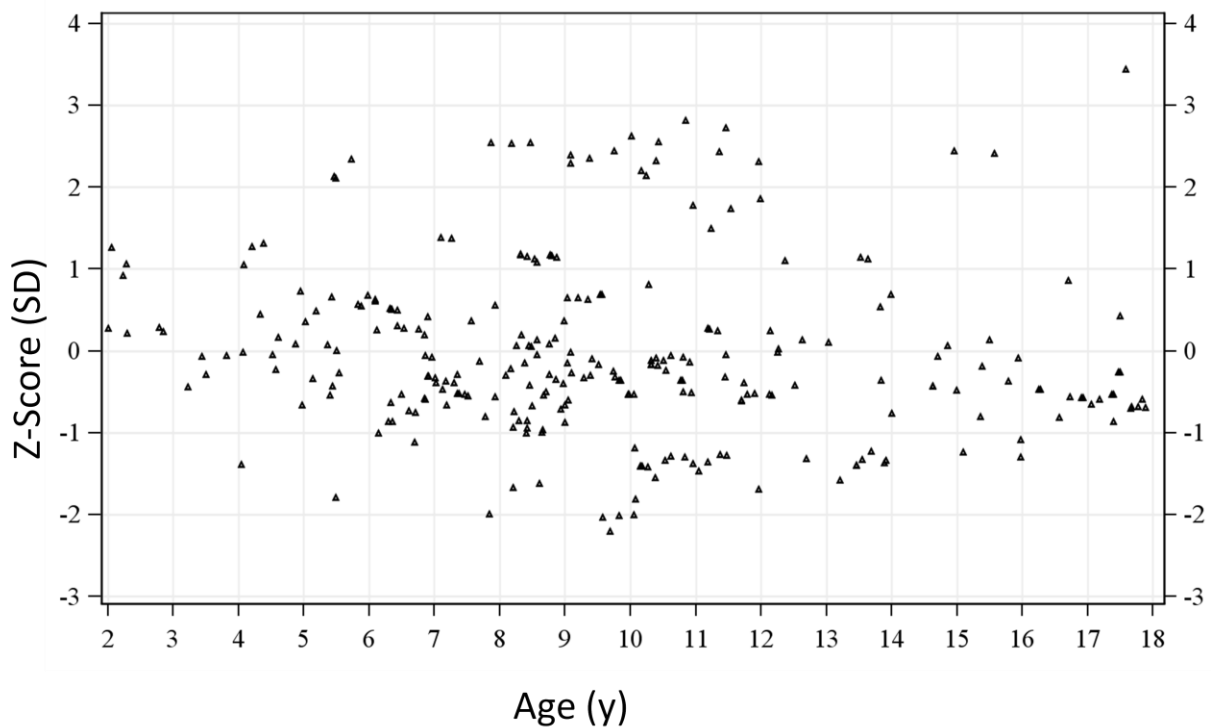

**Supplement Figure 3: Z-scores for age for MPS VI patients age 2-18 y and slowly progressive disease.**

The reference growth curves for slowly progressing MPS VI patients (Figure 3) was used to plot z-scores of patients with pre-ERT uGAG levels of  $\leq 200$   $\mu\text{g}/\text{mg}$  creatinine. All available pre-ERT (or those obtained within 1 month of ERT) height measurements were plotted with some patients contributing  $>1$  data point as described in the methods. The number of baseline visits within  $+2$  and  $-2$  SD were 123 of 128 (96.1%) for the slowly progressing patients.

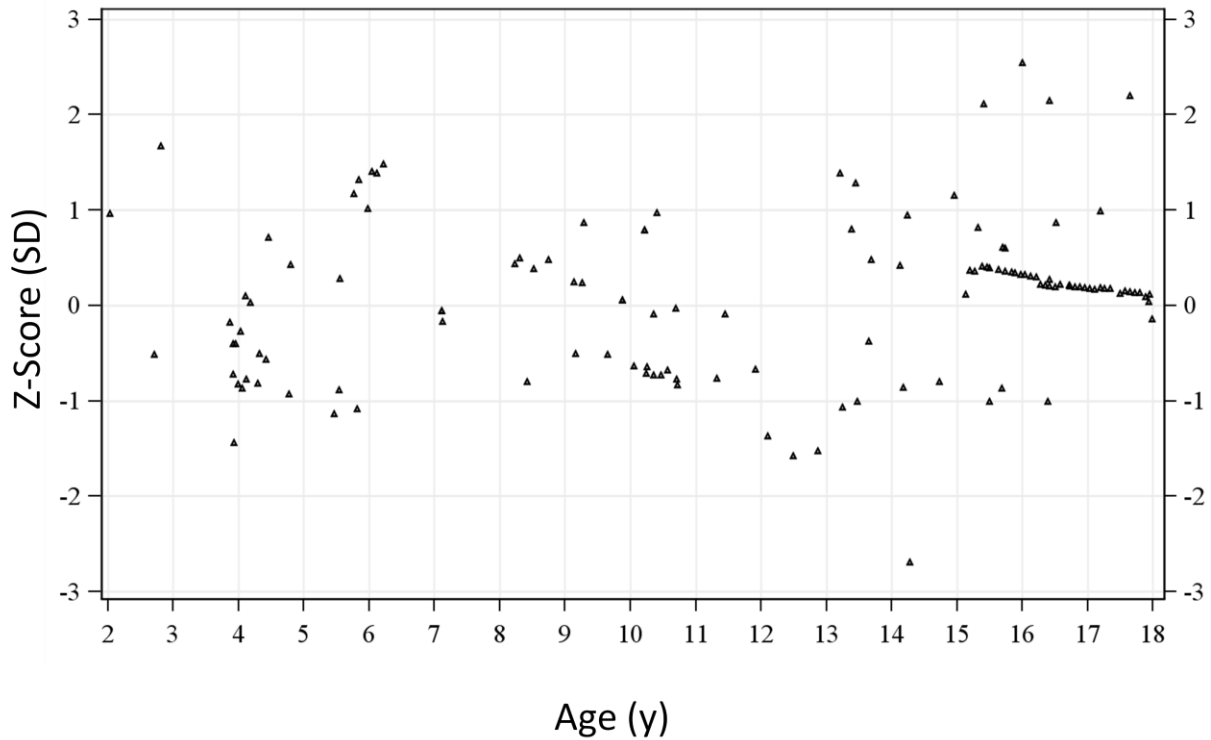

**Supplement Figures 4-6** are enclosed as separate PDF files.
