# Supplementary material
Source: PubMed Central journal article supplement (PMC4361922)

## 2 to 18 years: MPS VI (rapidly progressing patients) Stature-for-age percentiles

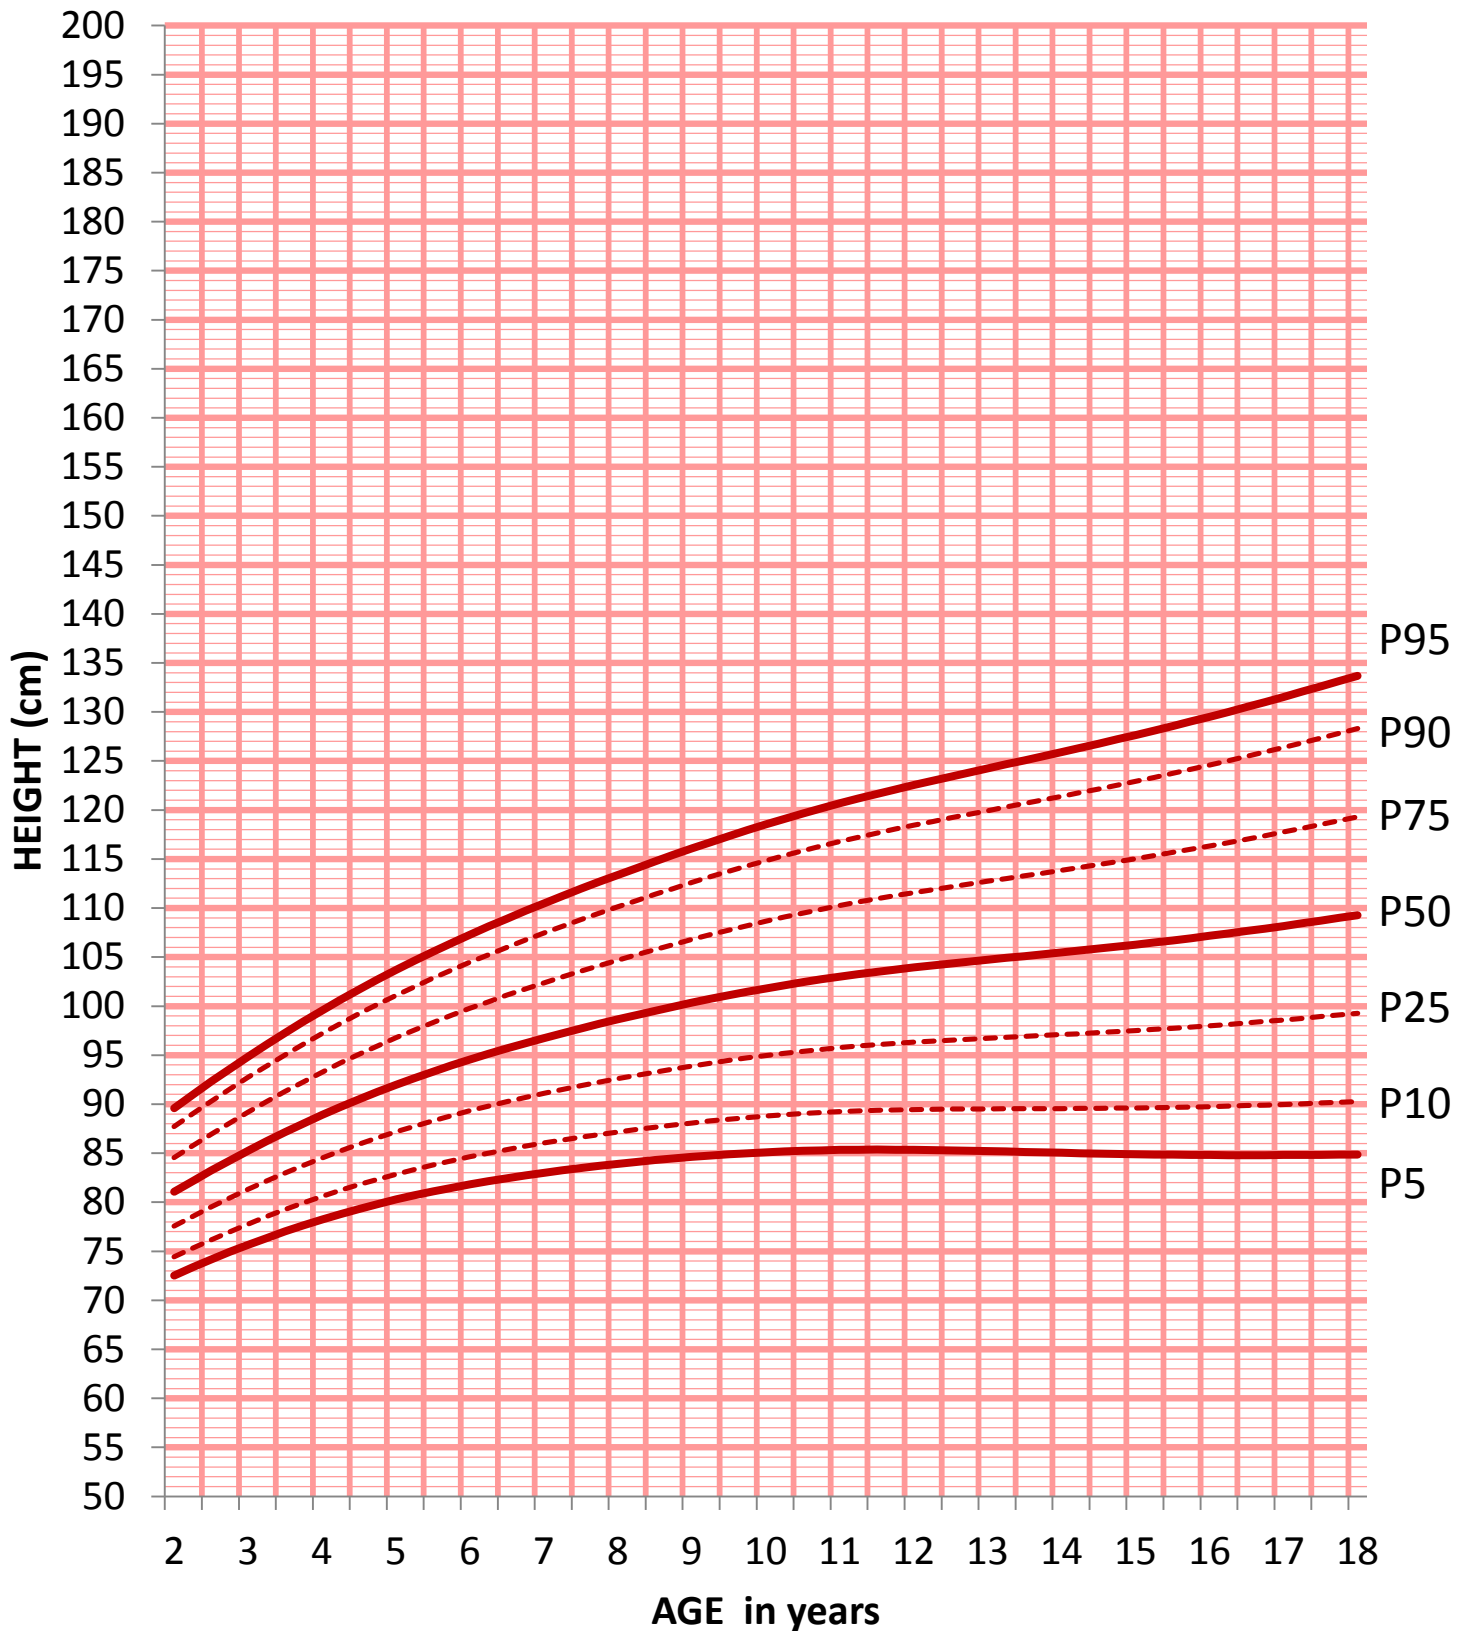

Supplement: 330197_1_En_333_MOESM3_ESM.pdf [file 330197_1_En_333_MOESM3_ESM.pdf]

## 2 to 18 years: MPS VI (slowly progressing patients) Stature-for-age percentiles

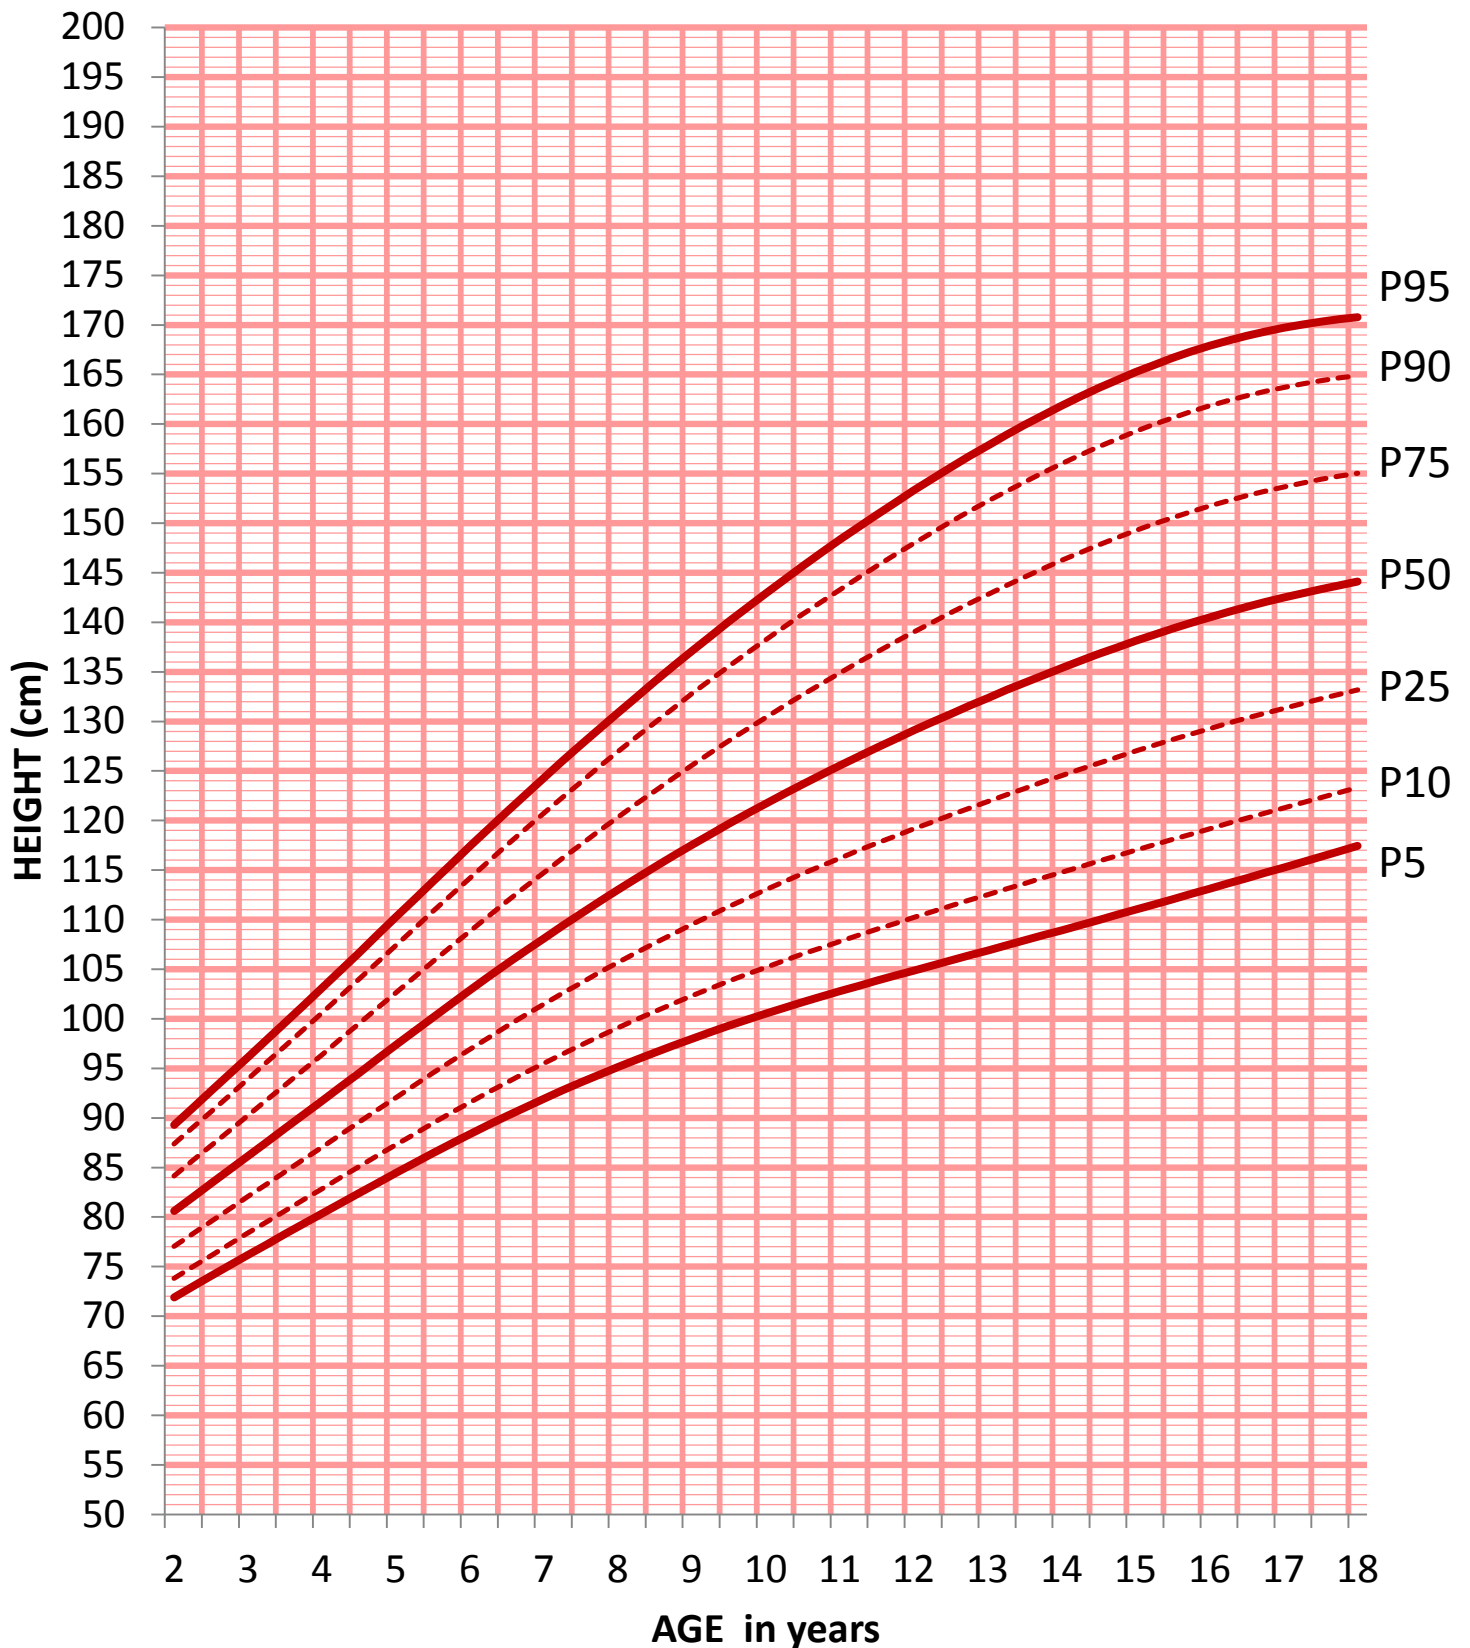

Supplement: 330197_1_En_333_MOESM4_ESM.pdf [file 330197_1_En_333_MOESM4_ESM.pdf]
